# Supplementary material for: Long-Term Impact of the COVID-19 Pandemic on In-Hospital Antibiotic Consumption and Antibiotic Resistance: A Time Series Analysis (2015–2021)
Source: MDPI journal article supplement (doi:10.3390/antibiotics11060826), 2022-06-20
Supplement: s1 [file _Long term impact Supplementary Tables.pdf › _Long term impact Supplementary Tables.pdf]

**Supplementary Table S1.** Effect of the COVID-19 pandemic on antibiotic consumption at the University Hospital of Modena

| Antibiotics                     | Parameter evaluated | Effect estimate | LCI    | UCI   | P value          |
|---------------------------------|---------------------|-----------------|--------|-------|------------------|
| Carbapenems                     | Change in trend     | 0.045           | -0.015 | 0.10  | 0.14             |
|                                 | Change in level     | 0.197           | -0.53  | 0.92  | 0.59             |
| Piperacillin/tazobactam         | Change in trend     | -0.43           | -0.69  | -0.17 | <b>0.001</b>     |
|                                 | Change in level     | 1.71            | -1.23  | 4.64  | 0.25             |
| III Generation Cephalosporins   | Change in trend     | 0.014           | -0.42  | 0.45  | 0.95             |
|                                 | Change in level     | -2.03           | -7.59  | 3.53  | 0.47             |
| Anti-Pseudomonal Cephalosporins | Change in trend     | -0.04           | -0.16  | 0.07  | 0.45             |
|                                 | Change in level     | -0.47           | -1.80  | 0.85  | 0.48             |
| Amoxicillin/clavulanate         | Change in trend     | -0.27           | -0.49  | -0.05 | <b>0.018</b>     |
|                                 | Change in level     | -2.20           | -4.86  | 0.45  | 0.10             |
| Fluoroquinolones                | Change in trend     | 0.07            | -0.14  | 0.28  | 0.52             |
|                                 | Change in level     | -1.31           | -3.81  | 1.19  | 0.30             |
| Glycopeptides                   | Change in trend     | -0.22           | -0.31  | -0.12 | <b>&lt;0.001</b> |
|                                 | Change in level     | 0.50            | -0.66  | 1.66  | 0.39             |
| Oxazolidinones                  | Change in trend     | -0.03           | -0.09  | 0.02  | 0.28             |
|                                 | Change in level     | 0.11            | -0.52  | 0.76  | 0.72             |
| Daptomycin                      | Change in trend     | -0.03           | -0.09  | 0.03  | 0.28             |
|                                 | Change in level     | 0.45            | -0.33  | 1.24  | 0.26             |
| Macrolides                      | Change in trend     | -0.30           | -0.84  | 0.24  | 0.27             |
|                                 | Change in level     | -0.63           | -7.41  | 6.14  | 0.85             |
| Fosfomycin                      | Change in trend     | 0.22            | -0.01  | 0.44  | 0.06             |
|                                 | Change in level     | -0.47           | -3.20  | 2.25  | 0.73             |
| Other classes                   | Change in trend     | -0.25           | -0.70  | 0.20  | 0.28             |
|                                 | Change in level     | -1.03           | -6.69  | 4.63  | 0.72             |
| All antibiotics                 | Change in trend     | -1.10           | -2.06  | -0.14 | <b>0.025</b>     |
|                                 | Change in level     | -3.03           | -14.7  | 8.69  | 0.61             |

Footnotes: LCI Lower Confidence Interval; UCI: Upper Confidence Interval. Change in level positively affected by the COVID-19 pandemic highlighted in red; change in level negatively influenced by the COVID-19 pandemic highlighted in green

**Supplementary Table S2.** Effect of COVID-19 pandemic on antibiotic consumption in the ICUs of the University Hospital of Modena

| Antibiotics                     | Parameter evaluated | Effect estimate | LCI    | UCI   | P value |
|---------------------------------|---------------------|-----------------|--------|-------|---------|
| Carbapenems                     | Change in trend     | 0.40            | -0.21  | 1.01  | 0.19    |
|                                 | Change in level     | -2.20           | -9.49  | 5.08  | 0.55    |
| Piperacillin/tazobactam         | Change in trend     | -0.59           | -1.33  | 0.15  | 0.12    |
|                                 | Change in level     | -3.51           | -12.4  | 5.36  | 0.43    |
| III Generation Cephalosporins   | Change in trend     | -0.75           | -1.94  | 0.45  | 0.22    |
|                                 | Change in level     | 3.59            | -10.99 | 18.18 | 0.62    |
| Anti-Pseudomonal Cephalosporins | Change in trend     | -0.08           | -0.59  | 0.42  | 0.74    |
|                                 | Change in level     | -1.28           | -7.30  | 4.74  | 0.67    |
| Amoxicillin/clavulanate         | Change in trend     | 0.05            | -0.40  | 0.49  | 0.84    |
|                                 | Change in level     | -0.72           | -6.03  | 4.58  | 0.79    |
| Fluoroquinolones                | Change in trend     | -0.11           | -0.61  | 0.39  | 0.66    |
|                                 | Change in level     | -0.85           | -6.93  | 5.23  | 0.78    |
| Glycopeptides                   | Change in trend     | -0.69           | -1.45  | 0.07  | 0.07    |
|                                 | Change in level     | -0.38           | -9.49  | 8.72  | 0.93    |
| Oxazolidinones                  | Change in trend     | -0.21           | -0.73  | 0.31  | 0.43    |
|                                 | Change in level     | 2.77            | -3.42  | 8.97  | 0.37    |
| Daptomycin                      | Change in trend     | -0.67           | -0.98  | -0.37 | <0.001  |
|                                 | Change in level     | 2.16            | -1.50  | 5.82  | 0.24    |
| Tetracyclines                   | Change in trend     | -0.005          | -0.68  | 0.67  | 0.99    |
|                                 | Change in level     | -1.15           | -9.17  | 6.86  | 0.77    |
| All antibiotics                 | Change in trend     | -4.47           | -8.88  | -0.06 | 0.047   |
|                                 | Change in level     | 17.27           | -35.5  | 70.0  | 0.51    |

Footnotes: LCI Lower Confidence Interval; UCI: Upper Confidence Interval. Change in level positively affected by the COVID-19 pandemic highlighted in red; change in level negatively influenced by the COVID-19 pandemic highlighted in green

**Supplementary Table S3.** Effect of COVID-19 pandemic on the incidence of bloodstream infections (BSI) and *C. difficile* infections at the University Hospital of Modena.

|                                                             | Parameter evaluated | Effect estimate | LCI    | UCI    | P value      |
|-------------------------------------------------------------|---------------------|-----------------|--------|--------|--------------|
| Carbapenem-susceptible <i>A. baumannii</i> BSI              | Change in trend     | 0.009           | -0.013 | 0.031  | 0.406        |
|                                                             | Change in level     | -0.027          | -0.250 | 0.196  | 0.812        |
| Carbapenem-resistant <i>A. baumannii</i> BSI                | Change in trend     | 0.020           | -0.026 | 0.066  | 0.386        |
|                                                             | Change in level     | -0.173          | -0.665 | 0.319  | 0.487        |
| Carbapenem-susceptible <i>P. aeruginosa</i> BSI             | Change in trend     | -0.001          | -0.128 | 0.126  | 0.991        |
|                                                             | Change in level     | 1.477           | 0.130  | 2.824  | <b>0.032</b> |
| Carbapenem-resistant <i>P. aeruginosa</i> BSI               | Change in trend     | -0.009          | -0.051 | 0.033  | 0.675        |
|                                                             | Change in level     | 0.133           | -0.319 | 0.5985 | 0.559        |
| Carbapenem-susceptible <i>K. pneumoniae</i> BSI             | Change in trend     | -0.022          | -0.169 | 0.125  | 0.767        |
|                                                             | Change in level     | 0.322           | -1.230 | 1.874  | 0.681        |
| Carbapenem-resistant <i>K. pneumoniae</i> BSI               | Change in trend     | -0.023          | -0.071 | 0.025  | 0.342        |
|                                                             | Change in level     | 0.344           | -0.162 | 0.850  | 0.179        |
| III generation Cephalosporin-susceptible <i>E. coli</i> BSI | Change in trend     | 0.162           | -0.137 | 0.461  | 0.284        |
|                                                             | Change in level     | -0.823          | -3.973 | 2.326  | 0.604        |
| III generation Cephalosporin-resistant <i>E. coli</i> BSI   | Change in trend     | 0.036           | -0.097 | 0.169  | 0.592        |
|                                                             | Change in level     | -0.487          | -1.897 | 0.923  | 0.493        |
| Methicillin-susceptible <i>S. aureus</i> BSI                | Change in trend     | -0.017          | -0.184 | 0.150  | 0.841        |
|                                                             | Change in level     | -1.482          | -0.295 | 3.259  | 0.101        |
| Methicillin-resistant <i>S. aureus</i> BSI                  | Change in trend     | -0.078          | -0.150 | -0.006 | <b>0.034</b> |
|                                                             | Change in level     | 0.722           | -0.039 | 1.482  | 0.062        |
| Vancomycin-susceptible <i>E. faecium</i> BSI                | Change in trend     | -0.062          | -0.180 | 0.057  | 0.269        |
|                                                             | Change in level     | 1.006           | -0.245 | 2.257  | 0.092        |
| Vancomycin-resistant <i>E. faecium</i> BSI                  | Change in trend     | 0.007           | -0.053 | 0.066  | 0.803        |
|                                                             | Change in level     | -0.097          | -0.744 | 0.549  | 0.751        |
| <i>C. difficile</i> Infections                              | Change in trend     | 1.43            | -0.002 | 2.86   | 0.051        |
|                                                             | Change in level     | -0.94           | -3.97  | 2.09   | 0.52         |

Footnotes: LCI Lower Confidence Interval; UCI: Upper Confidence Interval. Change in level positively affected by the COVID-19 pandemic highlighted in red; change in level negatively influenced by the COVID-19 pandemic highlighted in green
